# Supplementary material
Source: HighWire-hosted journal article supplement (https://www.jneurosci.org/highwire/filestream/597622/field_highwire_adjunct_files/0/SupplementalData.pdf)
Supplement: SupplementalData.pdf [file SupplementalData.pdf]

## Supplemental Data

**Table 1S** DG Arc mRNA learning-specific expression in 400- $\mu$ m-thick coronal HC segments following navigation based on recent and remote spatial memories

| DG                               | Recent memory |                     |                                        | Remote memory |                     |                                       |                 |
|----------------------------------|---------------|---------------------|----------------------------------------|---------------|---------------------|---------------------------------------|-----------------|
| Segment, mm from interaural line | DF=N-3        | ANOVA, F-statistics | Fisher's <i>post hoc</i> test, p value | DF=N-3        | ANOVA, F-statistics | Fisher's <i>pos hoc</i> test, p value | t-test, p value |
| 6.61-7.0                         | 27            | 38.23               | 0.55                                   | 27            | 36.46               | 0.22                                  | 0.77            |
| 6.21-6.6                         | 72            | 103                 | 0.066                                  | 63            | 82.15               | 0.73                                  | 0.54            |
| 5.81-6.2                         | 87            | 106.7               | <0.0001                                | 111           | 154.2               | 0.10                                  | <0.01           |
| 5.41-5.8                         | 69            | 118.9               | <0.0001                                | 117           | 183.2               | 0.3                                   | <0.0005         |
| 5.01-5.4                         | 87            | 56.9                | <0.0001                                | 102           | 203.4               | <0.036                                | 0.11            |
| 4.61-5.0                         | 15            | 22.68               | <0.005                                 | 54            | 44.75               | 0.59                                  | 0.11            |
| 4.21-4.6                         | -             | -                   | -                                      | 33            | 30.1                | 0.98                                  | -               |
| 3.81-4.2                         | 36            | 84.3                | <0.002                                 | 39            | 77.8                | <0.0001                               | 0.65            |
| 3.01-3.55                        | 48            | 24.65               | <0.0003                                | 33            | 26.69               | <0.02                                 | 0.83            |
| 2.61-3.0                         | 42            | 29.9                | <0.0001                                | 18            | 10.79               | 0.066                                 | 0.27            |

For all F-statistics  $p < 0.0001$  has been reached. Fisher's *post hoc* test indicates a significant difference between WMT and SW groups only. Differences between WMT and naïve, and SW and naïve were always highly significant ( $p < 0.0001$ ) and are not represented in this table. The ventral HC segments are presented below the dorsal HC segments and have similar coordinates. The segments 7.0-7.4; 3.41-3.8; 4.21-4.6 and 3.81-4.2 with the number of data points less than four were not included in the statistical analysis, and other such segments are indicated by (-). Borders of some segments were slightly extended beyond 400- $\mu$ m limit to include few data points. T-test was applied to compare the normalized magnitude of recent and long-term memory signal for every 400- $\mu$ m segment.

**Table 2S** CA3 Arc mRNA learning-specific expression in 400- $\mu$ m-thick coronal HC segments following navigation based on recent and remote spatial memories

| CA3       | Recent memory |                        |                                                 | Remote memory |                         |                                                | t-test,<br>p value |
|-----------|---------------|------------------------|-------------------------------------------------|---------------|-------------------------|------------------------------------------------|--------------------|
|           | DF=N-3        | ANOVA,<br>F-statistics | Fisher's<br><i>post hoc</i><br>test,<br>p value | DF=N-3        | ANOVA, F-<br>statistics | Fisher's<br><i>pos hoc</i><br>test,<br>p value |                    |
| 7.01-7.4  | 18            | 42.2                   | 0.62                                            | 54            | 144.3                   | <0.022                                         | 0.61               |
| 6.61-7.0  | 69            | 138.2                  | <0.048                                          | 63            | 228.4                   | <0.006                                         | 0.89               |
| 6.21-6.6  | 81            | 377.1                  | <0.028                                          | 75            | 140.9                   | <0.0001                                        | <0.05              |
| 5.81-6.2  | 87            | 412.6                  | <0.0001                                         | 104           | 404.9                   | <0.0001                                        | <0.03              |
| 5.41-5.8  | 66            | 249.5                  | <0.0001                                         | 117           | 229.3                   | 0.21                                           | <0.001             |
| 5.01-5.4  | 90            | 216.9                  | <0.0001                                         | 108           | 289.4                   | 0.45                                           | <0.0003            |
| 4.69-5.0  | 12            | 28.5                   | <0.043                                          | 42            | 100.5                   | <0.0005                                        | 0.94               |
| 4.21-4.68 | -             | -                      | -                                               | 45            | 92.6                    | 0.21                                           | -                  |
| 3.81-4.2  | 39            | 22.6                   | 0.53                                            | 13            | 24.98                   | 0.32                                           | 0.29               |
| 3.01-3.8  | 9             | 2.6                    | 0.13                                            | 14            | 151.8                   | <0.0057                                        | 0.39               |

See **Table 1S** for details.

**Table 3S** CA1 learning-specific Arc mRNA expressions in 400- $\mu$ m-thick coronal HC segments following navigation based on recent and remote spatial memories

| CA1                              | Recent memory |                     |                                        | Remote memory |                     |                                       | t-test, p value |
|----------------------------------|---------------|---------------------|----------------------------------------|---------------|---------------------|---------------------------------------|-----------------|
|                                  | DF=N-3        | ANOVA, F-statistics | Fisher's <i>post hoc</i> test, p value | DF=N-3        | ANOVA, F-statistics | Fisher's <i>pos hoc</i> test, p value |                 |
| Segment, mm from interaural line |               |                     |                                        |               |                     |                                       |                 |
| 6.61-7.0                         | 66            | 57.3                | 0.95                                   | 72            | 186.1               | 0.096                                 | 0.54            |
| 6.21-6.6                         | 81            | 262.9               | 0.41                                   | 75            | 114.9               | <0.025                                | <0.05           |
| 5.81-6.2                         | 87            | 318.5               | <0.0001                                | 111           | 484.7               | 0.139                                 | <0.05           |
| 5.41-5.8                         | 66            | 465.5               | <0.0001                                | 117           | 204.1               | 0.93                                  | <0.05           |
| 5.01-5.4                         | 90            | 232.7               | <0.0001                                | 102           | 374.9               | <0.048                                | <0.004          |
| 4.61-5.0                         | 15            | 37.7                | <0.027                                 | 54            | 110.5               | 0.36                                  | 0.42            |
| 4.21-4.6                         | -             | -                   | -                                      | 36            | 251.9               | 0.68                                  | -               |
| 3.81-4.2                         | 42            | 107.3               | 0.62                                   | 39            | 248.2               | 0.79                                  | 0.69            |
| 4.21-4.6                         | -             | -                   | -                                      | 42            | 85.3                | 0.81                                  | -               |
| 3.81-4.2                         | 33            | 25.67               | <0.004                                 | 36            | 69.4                | 0.2                                   | 0.052           |
| 3.01-3.4                         | 57            | 119.82              | <0.0001                                | 33            | 165.7               | 0.12                                  | <0.0007         |
| 2.61-3.0                         | 48            | 169.6               | <0.0001                                | 27            | 70.1                | 0.22                                  | <0.0004         |

See **Table 1S** for details.

**Table 4S** Subiculum Arc mRNA learning-specific expression in 400- $\mu$ m-thick coronal HC segments following navigation based on recent and remote spatial memory

| Subiculum                        | Recent memory |                     |                                        | Remote memory |                     |                                       | t-test, p value |
|----------------------------------|---------------|---------------------|----------------------------------------|---------------|---------------------|---------------------------------------|-----------------|
|                                  | DF=N-3        | ANOVA, F-statistics | Fisher's <i>post hoc</i> test, p value | DF=N-3        | ANOVA, F-statistics | Fisher's <i>pos hoc</i> test, p value |                 |
| Segment, mm from interaural line |               |                     |                                        |               |                     |                                       |                 |
| 5.81-6.2                         | 27            | 139.5               | <0.003                                 | 45            | 251.2               | 0.025                                 | 0.27            |
| 5.41-5.8                         | 57            | 230.1               | <0.0001                                | 114           | 250.2               | 0.49                                  | <0.03           |
| 5.01-5.4                         | 90            | 248.1               | 0.42                                   | 102           | 312.4               | 0.97                                  | 0.73            |
| 4.61-5.0                         | 9             | 12.7                | <0.038                                 | 54            | 121.2               | <0.0009                               | 0.21            |
| 4.21-4.6                         | -             | -                   | -                                      | 36            | 88.9                | <0.0017                               | -               |
| 3.81-4.2                         | 39            | 130.07              | 0.36                                   | 39            | 336.2               | 0.59                                  | 0.46            |
| 3.37-3.8                         | 15            | 39.86               | 0.21                                   | -             | -                   | -                                     | -               |
| 4.21-4.6                         | -             | -                   | -                                      | 33            | 52.4                | 0.25                                  | -               |
| 3.81-4.2                         | 33            | 17.39               | 0.38                                   | 39            | 59.2                | 0.187                                 | 0.86            |
| 3.01-3.4                         | 93            | 269.1               | <0.0001                                | 45            | 342.1               | <0.0036                               | <0.02           |
| 2.61-3.0                         | 108           | 318.2               | <0.0001                                | 57            | 365.2               | <0.0001                               | <0.009          |

See **Table 1S** for details.
